# Supplementary material for: Dissecting BAR Domain Function in the Yeast Amphiphysins Rvs161 and Rvs167 during Endocytosis
Source: PubMed Central journal article supplement — Mol Biol Cell. 2010 Sep 1;21(17):3054–69. doi: 10.1091/mbc.E10-03-0181 (PMC2929998; doi:10.1091/mbc.e10-03-0181), 2010-09-01
Supplement: E10-03-0181_1.pdf [file E10-03-0181_1.pdf]

## SUPPLEMENTARY FIGURE LEGENDS

### Supplementary Figure 1.

Western blot analysis showing protein levels of Rvs161 and Rvs167 harboring modifications in their BAR domain. (A) Strains carrying substitutions or truncations in the BAR domain of Rvs161 were used to assess the protein levels of Rvs161 and its partner, Rvs167.  $\alpha$ -Swi6 was used as a loading control. (\* Nonspecific band co-migrating with Rvs161. This cross-reacting band is clearly separated in *rvs161- $\Delta$ N* lane.) (B) Mutants carrying substitutions or truncations in the BAR domain of *RVS167* are compared to the wild-type to look for changes in their protein levels. (C) Double mutants harboring symmetrical changes in both *RVS161* and *RVS167* BAR domain were analyzed in the same manner.

### Supplementary Figure 2.

Limited plate-mating analysis of *rvs161* BAR domain mutants. Haploid strains were mixed and allowed to mate on a YPD plate for 5hrs at 30°C, which was then replica-plated onto a diploid selection plate, YPD+G418+NAT. The top panel shows an YPD mating plate and the bottom panel shows the diploid selection plate, both 24 h post-mating.

### Supplementary Figure 3.

Serial spot dilution assay showing comparative fitness of *rvs161* single BAR domain mutants and *rvs161 rvs167* double mutants on YPD and YPD+0.5M NaCl. Additional mutation in *RVS167* BAR domain enhances growth sensitivity to salt in all strains, except *AP* and  *$\Delta$ N*.

### Supplementary Figure 4.

Actin polarization defects in the BAR domain mutants. Actin structures in log-phase cells were stained with rhodamine-phalloidin and small-budded cells were assessed for actin patch polarization defects. Cells were defined as polarized when more than 75% of the total actin patches were localized in the daughter cell (n>100).

### Supplementary Figure 5.

Lifetime of the early endocytic vesicle coat marker, Sla1-GFP, at the membrane surface in each BAR domain mutant background.

### Supplementary Figure 6.

(A) Western blot analysis showing protein levels of C-terminally GFP-tagged Rvs167 in BAR domain mutants.  $\alpha$ -Hexokinase was used as a loading control. (B) Functional complementation assay for C-terminally GFP-tagged Rvs167 strains used in this study. Serial spot dilution assays show growth sensitivity of untagged BAR domain double mutants compared to C-terminally GFP-tagged double mutants on different salt conditions (YPD+0.5M NaCl, YPD+0.7M NaCl).

### Supplementary Figure 7.

(A) Growth sensitivity of BAR domain mutants on medium containing Aur1 inhibitor, AureobasidinA (0.1µg/ml). Serially diluted strains were spotted onto YPD, YPD+ AureobasidinA (0.1µg/ml) plates, which were grown for 2 days (YPD) or 4 days (YPD+AureobasidinA) at 30°C. (B) Rvs167-GFP protein levels in the presence or absence of AureobasidinA (0.2µg/ml). Wild-type and *rvs161-RC rvs167-RC-GFP* strains were incubated with AureobasidinA (0.2µg/ml) for indicated times and were collected to compare GFP-tagged Rvs167 protein levels using western blot analysis.

### **Supplementary Movie 1.**

Rvs167-GFP was visualized every second in a time course of two minutes total.

### **Supplementary Movie 2.**

Rvs167-RC-GFP in *rvs161-RC* background was imaged every second in a time course of two minutes total.

### **Supplementary Table 1.**

Strains used in this study

Supplementary Figure 1

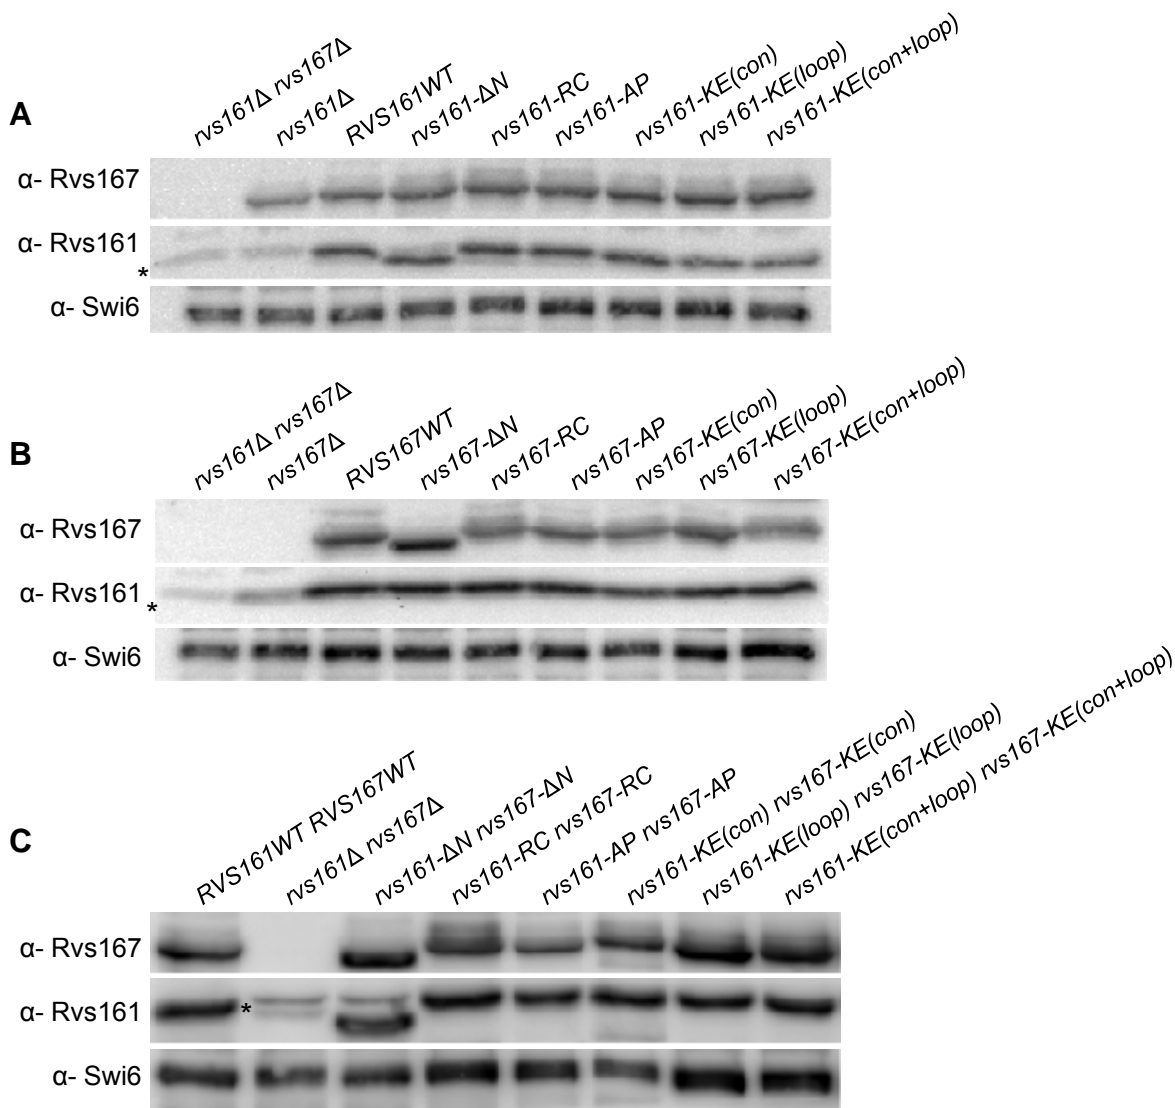



Supplementary Figure 3

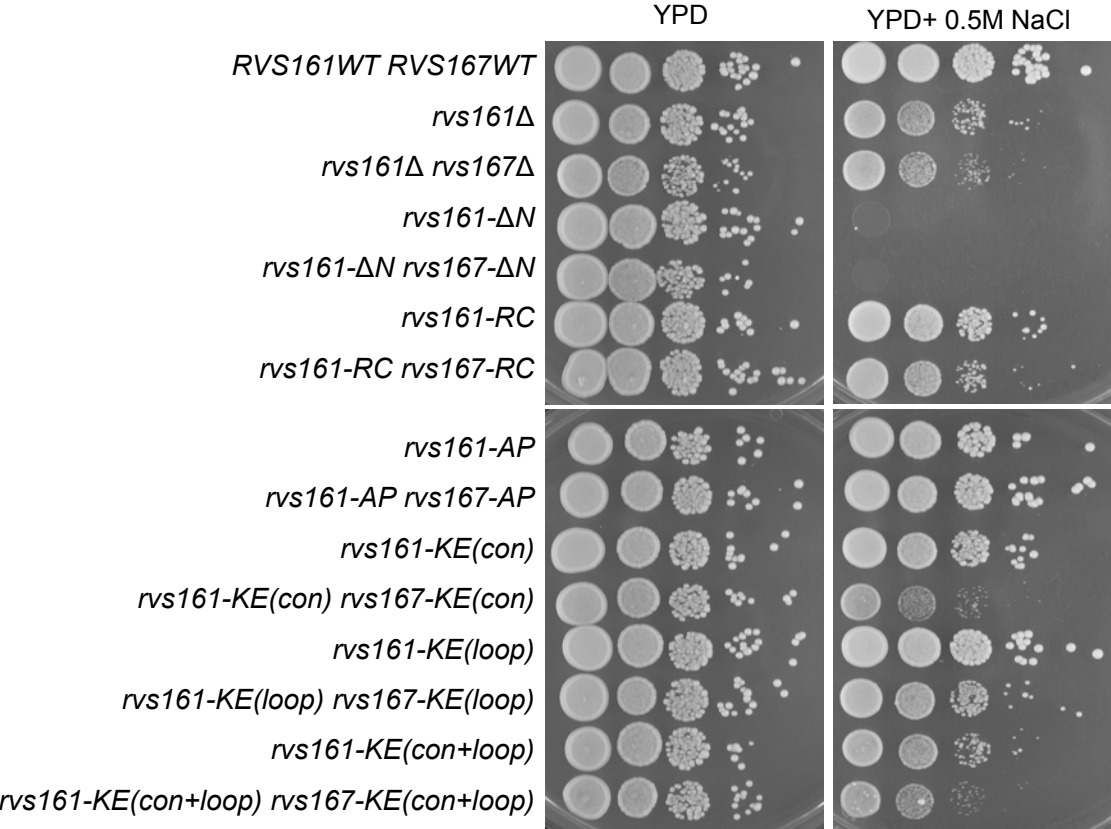

Supplementary Figure 4

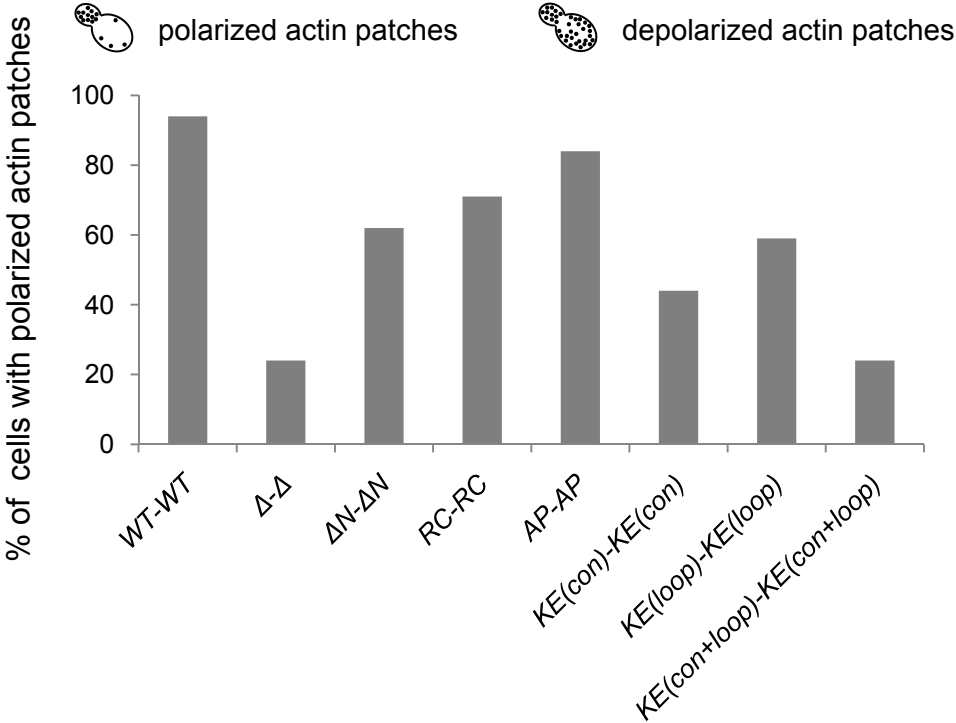

Supplementary Figure 5

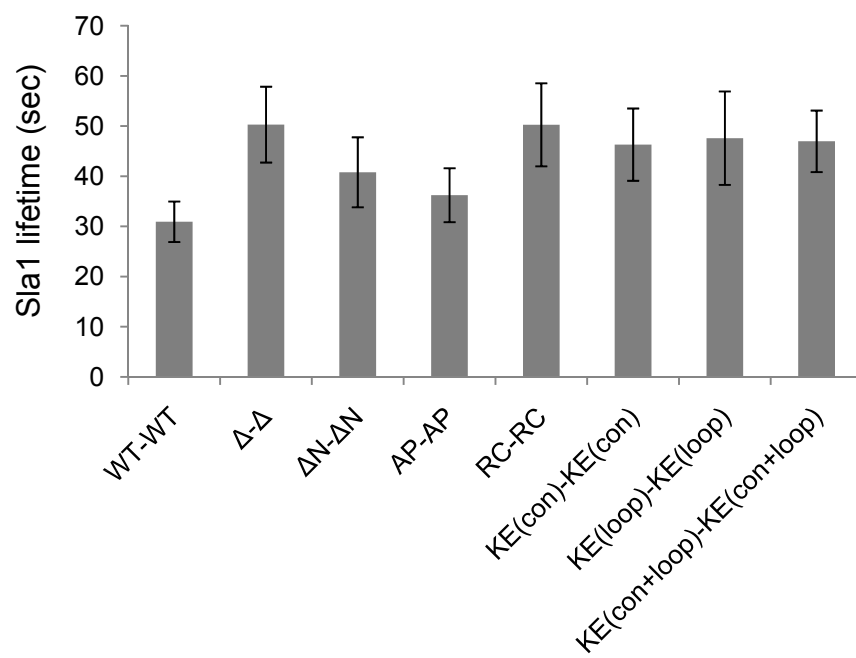

# Supplementary Figure 6

**A**

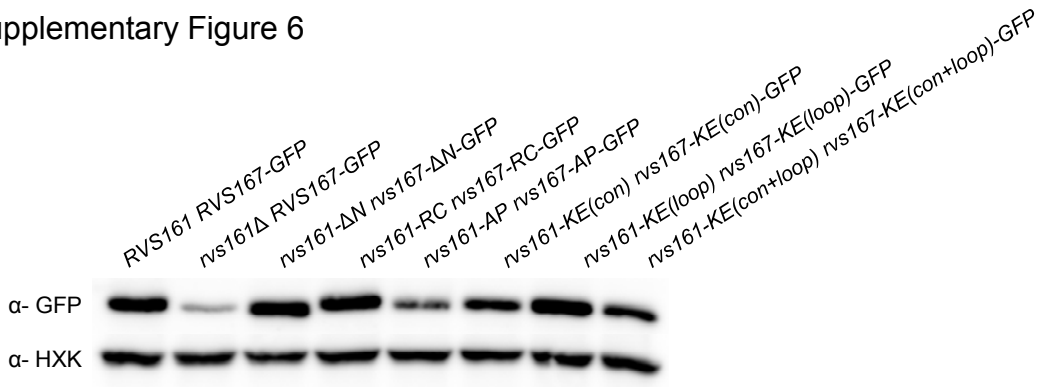

**B**

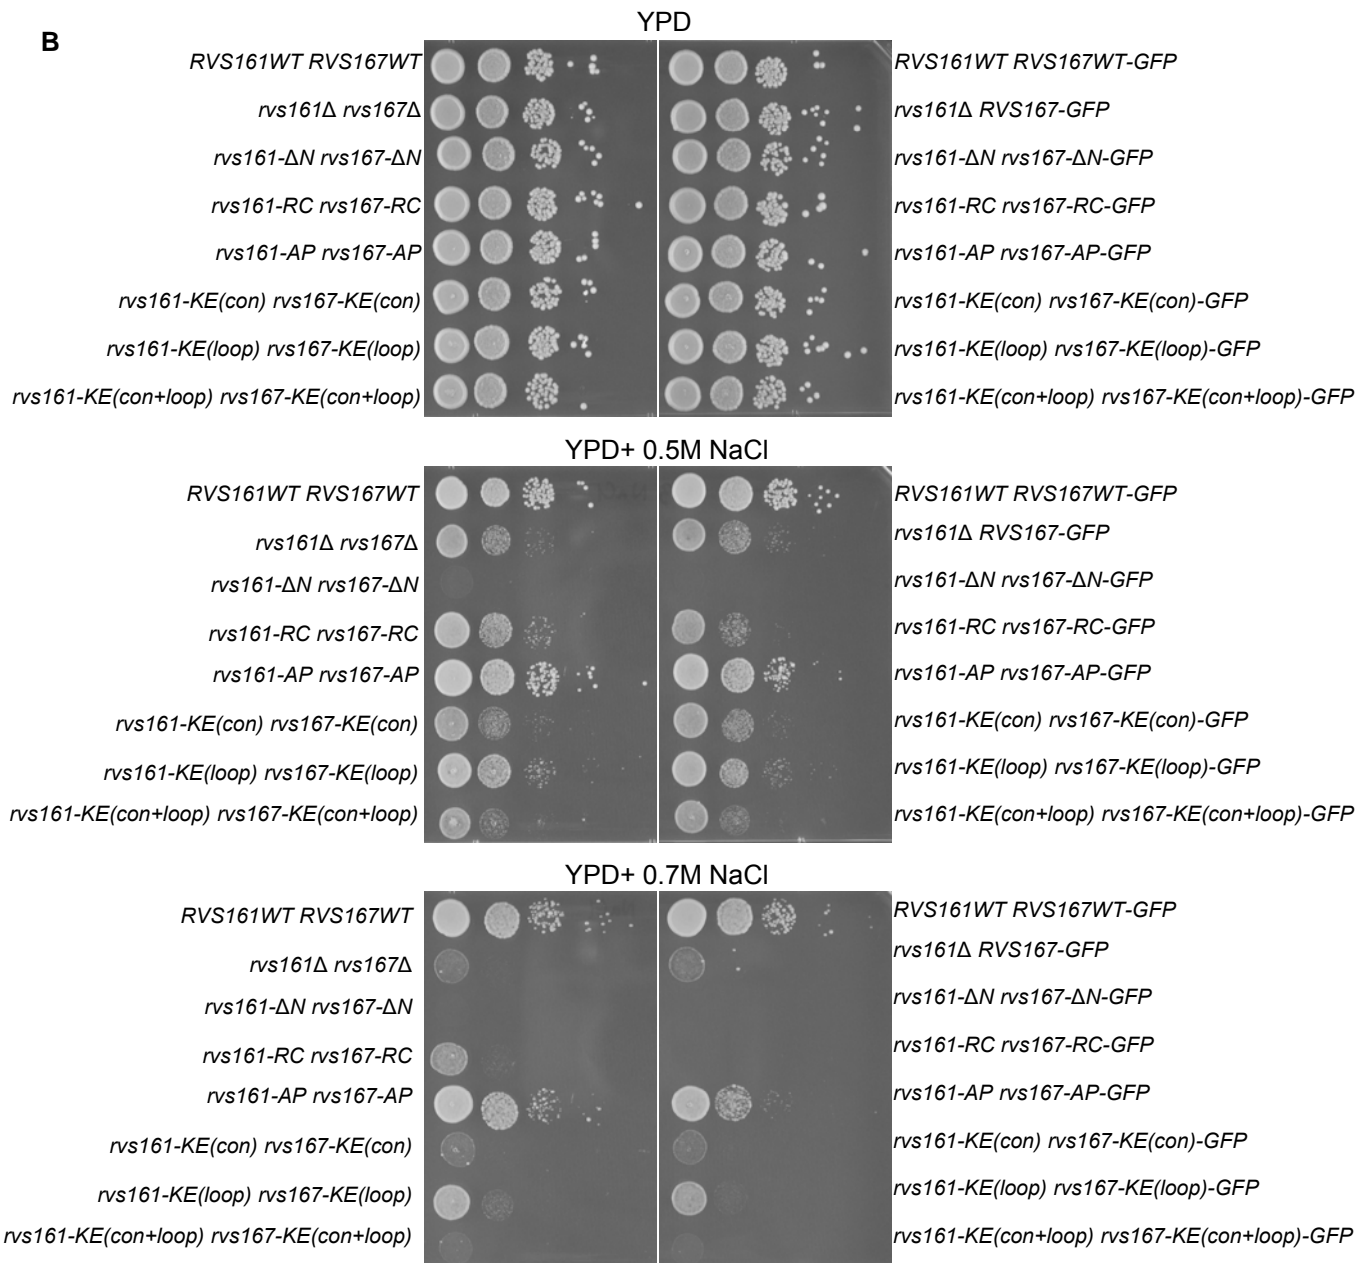





**Supplementary Table I. Yeast Strains Used in This Study**

| Yeast Strain                                        | Strain Genotype                                                                                                                                                                                              | Source                                                |
|-----------------------------------------------------|--------------------------------------------------------------------------------------------------------------------------------------------------------------------------------------------------------------|-------------------------------------------------------|
| <i>rvs161 rvs167</i> strains used for BiFC analysis |                                                                                                                                                                                                              |                                                       |
| BY4646                                              | BY4422 <i>MAT<math>\alpha</math> RVS167-VC::kan::Hph</i>                                                                                                                                                     | This study                                            |
| BY4647                                              | BY4741a <i>Nat::RVS161-VN::His3</i>                                                                                                                                                                          | This study                                            |
| BY4648                                              | diploid of BY4646 x BY4647                                                                                                                                                                                   | This study                                            |
| BY4674                                              | BY4422 <i>MAT<math>\alpha</math> EDE1-VC::kan</i>                                                                                                                                                            | This study                                            |
| BY4675                                              | BY4741a <i>EDE1-VN::His3</i>                                                                                                                                                                                 | This study                                            |
| BY4649                                              | BY4741a <i>RVS167-VN::His3::Hph</i>                                                                                                                                                                          | This study                                            |
| BY4678                                              | diploid of BY4674 x BY4649                                                                                                                                                                                   | This study                                            |
| BY4677                                              | diploid of BY4675 x BY4646                                                                                                                                                                                   | This study                                            |
| BY4650                                              | diploid of BY4646 x BY4649                                                                                                                                                                                   | This study                                            |
| BY4651                                              | BY4650 <i>ABP1-mCherry::URA3</i>                                                                                                                                                                             | This study                                            |
| BY4652                                              | BY4049 <i>MAT<math>\alpha</math> rvs161<math>\Delta</math>::URA3 RVS167-VC::kan::Hph</i>                                                                                                                     | This study                                            |
| BY4653                                              | BY4741a <i>rvs161<math>\Delta</math>::URA3 RVS167-VN::His3</i>                                                                                                                                               | This study                                            |
| BY4654                                              | diploid of BY4652 x BY4653                                                                                                                                                                                   | This study                                            |
| BY4655                                              | BY4654 with pRS315-RVS161                                                                                                                                                                                    | This study                                            |
| Strains used in limited-mating assays               |                                                                                                                                                                                                              |                                                       |
| BY4741a                                             | <i>MAT<math>\alpha</math> his3<math>\Delta</math>1 leu2<math>\Delta</math>0 ura3<math>\Delta</math>0 met15<math>\Delta</math>0</i><br>BY4741a <i>fus1<math>\Delta</math>::kan</i>                            | Brachmann <i>et al.</i> (1998)<br>Deletion consortium |
| BY4406                                              | BY4741a <i>rvs161<math>\Delta</math>::URA3<sup>1,2,3</sup></i>                                                                                                                                               | This study                                            |
| BY4405                                              | BY4741a <i>rvs161<math>\Delta</math>::URA3 fus1<math>\Delta</math>::kan<sup>1,2,3</sup></i>                                                                                                                  | This study                                            |
| <i>rvs161</i> alone                                 |                                                                                                                                                                                                              |                                                       |
| BY4360                                              | <i>MAT<math>\alpha</math> his3<math>\Delta</math>1 leu2<math>\Delta</math>0 ura3<math>\Delta</math>0 lys2<math>\Delta</math>0 can1<math>\Delta</math>0 mfa1<math>\Delta</math>::MFA1pr-HIS3 Nat::RVS161+</i> | This study                                            |
| BY4049                                              | BY4360 <i>Nat::rvs161<math>\Delta</math>::URA3</i>                                                                                                                                                           | This study                                            |
| BY4366                                              | BY4360 <i>Nat::rvs161-<math>\Delta</math>N</i>                                                                                                                                                               | This study                                            |
| BY4061                                              | BY4360 <i>Nat::rvs161-R35C</i>                                                                                                                                                                               | This study                                            |
| BY4057                                              | BY4360 <i>Nat::rvs161-A175P</i>                                                                                                                                                                              | This study                                            |
| BY4362                                              | BY4360 <i>Nat::rvs161-K136E, K140E</i>                                                                                                                                                                       | This study                                            |
| BY4613                                              | BY4360 <i>Nat::rvs161-K157E, K160E</i>                                                                                                                                                                       | This study                                            |
| BY4364                                              | BY4360 <i>Nat::rvs161-K136E, K140E, K157E, K160E</i>                                                                                                                                                         | This study                                            |
| <i>rvs167</i> alone                                 |                                                                                                                                                                                                              |                                                       |
| BY4051                                              | <i>MAT<math>\alpha</math> RVS167<sup>+</sup>::Hph his3<math>\Delta</math>1 leu2<math>\Delta</math>0 ura3<math>\Delta</math>0 met15<math>\Delta</math>0</i>                                                   | This study                                            |
| BY4063                                              | BY4051 <i>rvs167<math>\Delta</math>::URA3 (1-890nt)::Hph</i>                                                                                                                                                 | This study                                            |
| BY4369                                              | BY4051 <i>rvs167-<math>\Delta</math>N::Hph</i>                                                                                                                                                               | This study                                            |
| BY4371                                              | BY4051 <i>rvs167-R37C::Hph</i>                                                                                                                                                                               | This study                                            |
| BY4373                                              | BY4051 <i>rvs167-A190P::Hph</i>                                                                                                                                                                              | This study                                            |
| BY4375                                              | BY4051 <i>rvs167-K148E, K152E::Hph</i>                                                                                                                                                                       | This study                                            |
| BY4377                                              | BY4051 <i>rvs167-K170E, K175E::Hph</i>                                                                                                                                                                       | This study                                            |

|                                                                                                  |                                                                                                      |                            |
|--------------------------------------------------------------------------------------------------|------------------------------------------------------------------------------------------------------|----------------------------|
| BY4379                                                                                           | BY4051 <i>rvs167-K148E K152E, K170E, K175E ::Hph</i>                                                 | This study                 |
| <hr/>                                                                                            |                                                                                                      |                            |
| <i>rvs161 rvs167</i> strains assayed for salt sensitivity and Lucifer Yellow uptake <sup>2</sup> |                                                                                                      |                            |
| BY4422                                                                                           | <i>MATα Nat::RVS161+ RVS167+::Hph his3Δ1 leu2Δ0 ura3Δ0 lys2Δ0 can1Δ0 mfa1Δ::MFA1pr-HIS3</i>          | This study                 |
| BY4395                                                                                           | BY4422 <i>Nat::rvs161Δ::URA3 rvs167Δ::URA3::Hph</i>                                                  | This study                 |
| BY4434                                                                                           | BY4422 <i>Nat::rvs161-ΔN rvs167-ΔN::Hph</i>                                                          | This study                 |
| BY4399                                                                                           | BY4422 <i>Nat::rvs161-R35C rvs167-R37C::Hph</i>                                                      | This study                 |
| BY4397                                                                                           | BY4422 <i>Nat::rvs161-A175P rvs167-A190P::Hph</i>                                                    | This study                 |
| BY4400                                                                                           | BY4422 <i>Nat::rvs161-K136E, K140E rvs167-K148E, K152E::Hph</i>                                      | This study                 |
| BY4622                                                                                           | BY4422 <i>Nat::rvs161-K157E, K160E rvs167-K170E, K175E ::Hph</i>                                     | This study                 |
| BY4412                                                                                           | BY4422 <i>Nat::rvs161-K136E, K140E, K157E, K160E rvs167-K148E, K152E, K170E, K175E ::Hph</i>         | This study                 |
| <hr/>                                                                                            |                                                                                                      |                            |
| <i>rvs161 rvs167</i> assayed for Sla1-GFP retraction                                             |                                                                                                      |                            |
| BY4527                                                                                           | <i>MATα his3-Δ200 ura3-52 leu2-3,112 SLA1-GFP::kan ABP1-RFP::His3</i>                                | DCT214 (Drubin Laboratory) |
| BY4572                                                                                           | BY4527 <i>MATα Nat::RVS161+ RVS167+::Hph</i>                                                         | This study                 |
| BY4571                                                                                           | BY4527 <i>MATα Nat::rvs161Δ::URA3 rvs167Δ::URA3::Hph</i>                                             | This study                 |
| BY4573                                                                                           | BY4527 <i>MATα Nat::rvs161-ΔN rvs167-ΔN::Hph</i>                                                     | This study                 |
| BY4577                                                                                           | BY4527 <i>MATα Nat::rvs161-R35C rvs167-R37C::Hph</i>                                                 | This study                 |
| BY4574                                                                                           | BY4527 <i>MATα Nat::rvs161-A175P rvs167-A190P::Hph</i>                                               | This study                 |
| BY4579                                                                                           | BY4527 <i>MATα Nat::rvs161-K136E, K140E rvs167-K148E, K152E::Hph</i>                                 | This study                 |
| BY4578                                                                                           | BY4527 <i>MATα Nat::rvs161-K157E, K160E rvs167-K170E, K175E ::Hph</i>                                | This study                 |
| BY4575                                                                                           | BY4527 <i>MATα Nat::rvs161-K136E, K140E, K157E, K160E rvs167-K148E, K152E, K170E, K175E ::Hph</i>    | This study                 |
| <hr/>                                                                                            |                                                                                                      |                            |
| <i>rvs161 rvs167</i> strains assayed for Rvs167 localization                                     |                                                                                                      |                            |
| BY4580                                                                                           | BY4422 <i>Nat::RVS161+ RVS167+-GFP::kan::Hph</i>                                                     | This study                 |
| BY4599                                                                                           | BY4422 <i>Nat::rvs161Δ::URA3 RVS167+-GFP::kan</i>                                                    | This study                 |
| BY4581                                                                                           | BY4434 <i>Nat::rvs161-ΔN rvs167-ΔN-GFP::kan::Hph</i>                                                 | This study                 |
| BY4585                                                                                           | BY4399 <i>Nat::rvs161-R35C rvs167-R37C-GFP::kan::Hph</i>                                             | This study                 |
| BY4582                                                                                           | BY4397 <i>Nat::rvs161-A175P rvs167-A190P-GFP::kan::Hph</i>                                           | This study                 |
| BY4588                                                                                           | BY4400 <i>Nat::rvs161-K136E, K140E rvs167-K148E, K152E-GFP::kan::Hph</i>                             | This study                 |
| BY4627                                                                                           | BY4622 <i>Nat::rvs161-K157E, K160E rvs167-K170E, K175E-GFP::kan::Hph</i>                             | This study                 |
| BY4587                                                                                           | BY4412 <i>Nat::rvs161-K136E, K140E, K157E, K160E rvs167-K148E, K152E, K170E, K175E-GFP::kan::Hph</i> | This study                 |
| BY4600                                                                                           | BY4580 <i>Nat::RVS161+ RVS167+-GFP::kan::Hph ABP1-mCherry::URA3</i>                                  | This study                 |
| BY4605                                                                                           | BY4585 <i>Nat::rvs161-R35C rvs167-R37C-GFP::kan::Hph ABP1-mCherry::URA3</i>                          | This study                 |
| BY4603                                                                                           | BY4582 <i>Nat::rvs161-A175P rvs167-A190P-GFP::kan::Hph ABP1-mCherry::URA3</i>                        | This study                 |

---

*rvs161 rvs167* strains used for genetic interaction with *INP52*

---

|        |                                                                                                            |            |
|--------|------------------------------------------------------------------------------------------------------------|------------|
| BY4702 | <i>MATa Nat::RVS161+ RVS167+::Hph hoΔ::kan his3Δ1 leu2Δ0 ura3Δ0 lyp1ΔSTE3pr-LEU2 can1Δ::STE2pr-his5</i>    | This study |
| BY4703 | BY4702 <i>rvs161Δ::Nat rvs167Δ::Hph hoΔ::kan</i>                                                           | This study |
| BY4704 | BY4702 <i>Nat::rvs161-ΔN rvs167-ΔN::Hph hoΔ::kan</i>                                                       | This study |
| BY4705 | BY4702 <i>Nat::rvs161-R35C rvs167-R37C::Hph hoΔ::kan</i>                                                   | This study |
| BY4706 | BY4702 <i>Nat::rvs161-A175P rvs167-A190P::Hph hoΔ::kan</i>                                                 | This study |
| BY4707 | BY4702 <i>Nat::rvs161-K137E, K141E rvs167-K148E, K152E::Hph hoΔ::kan</i>                                   | This study |
| BY4708 | BY4702 <i>Nat::rvs161-K157E, K160E rvs167-K170E, K175E ::Hph hoΔ::kan</i>                                  | This study |
| BY4709 | BY4702 <i>Nat::rvs161-K137E, K141E, K157E, K160E rvs167-K148E, K152E, K170E, K175E ::Hph hoΔ::kan</i>      | This study |
| BY4710 | <i>MATa Nat::RVS161+ RVS167+::Hph inp52Δ::kan his3Δ1 leu2Δ0 ura3Δ0 lyp1ΔSTE3pr-LEU2 can1Δ::STE2pr-his5</i> | This study |
| BY4711 | BY4702 <i>rvs161Δ::Nat rvs167Δ::Hph inp52Δ::kan</i>                                                        | This study |
| BY4712 | BY4702 <i>Nat::rvs161-ΔN rvs167-ΔN::Hph inp52Δ::kan</i>                                                    | This study |
| BY4713 | BY4702 <i>Nat::rvs161-R35C rvs167-R37C::Hph inp52Δ::kan</i>                                                | This study |
| BY4714 | BY4702 <i>Nat::rvs161-A175P rvs167-A190P::Hph inp52Δ::kan</i>                                              | This study |
| BY4715 | BY4702 <i>Nat::rvs161-K137E, K141E rvs167-K148E, K152E::Hph inp52Δ::kan</i>                                | This study |
| BY4716 | BY4702 <i>Nat::rvs161-K157E, K160E rvs167-K170E, K175E ::Hph inp52Δ::kan</i>                               | This study |
| BY4717 | BY4702 <i>Nat::rvs161-K137E, K141E, K157E, K160E rvs167-K148E, K152E, K170E, K175E ::Hph inp52Δ::kan</i>   | This study |

---

<sup>1</sup> This strain may be *can1Δ0* and/ or *mfa1Δ::MFA1pr-HIS3*

<sup>2</sup> Some of the strains in this group are *met15Δ0* and/or *lys2Δ0*

<sup>3</sup> Some of these strains may be *met15Δ0*
